# Supplementary material for: Design of Protegrin-1 Analogs with Improved Antibacterial Selectivity
Source: MDPI journal article supplement (doi:10.3390/pharmaceutics15082047), 2023-07-30
Supplement: s1 [file s1]

# Supplementary Materials: Design of Protegrin-1 Analogs with Improved Antibacterial Selectivity

Ilia A. Bolosov <sup>1</sup>, Pavel V. Panteleev <sup>1</sup>, Sergei V. Sychev <sup>1</sup>, Veronika A. Khokhlova <sup>1</sup>, Victoria N. Safronova <sup>1</sup>,  
Ilia Yu. Toropygin <sup>2</sup>, Tatiana I. Kombarova <sup>3</sup>, Olga V. Korobova <sup>3</sup>, Eugenia S. Pereskokova <sup>3</sup>, Alexander I. Borzilov <sup>3</sup>,  
Tatiana V. Ovchinnikova <sup>1,4</sup> and Sergey V. Balandin <sup>1,\*</sup>

<sup>1</sup> M. M. Shemyakin & Yu. A. Ovchinnikov Institute of Bioorganic Chemistry, the Russian Academy of Sciences, 117997 Moscow, Russia; bolosov@ibch.ru (I.A.B.); p.v.panteleev@gmail.com (P.V.P.); ovch@ibch.ru (T.V.O.)

<sup>2</sup> V. N. Orekhovich Research Institute of Biomedical Chemistry, 119121 Moscow, Russia

<sup>3</sup> State Research Center for Applied Microbiology & Biotechnology (SRCAMB), 142279 Obolensk, Russia

<sup>4</sup> Department of Biotechnology, I. M. Sechenov First Moscow State Medical University, 119991 Moscow, Russia

\* Correspondence: arenicin@mail.ru

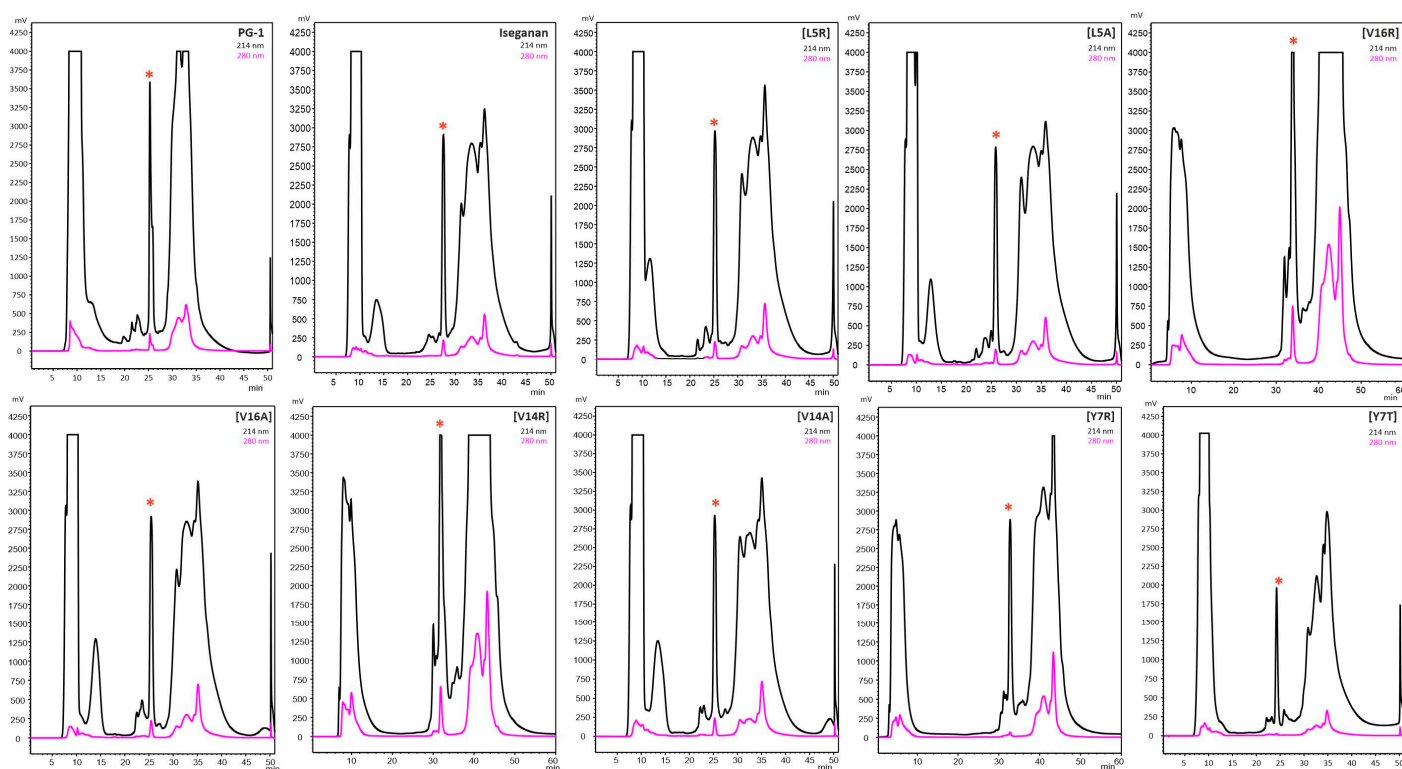

**Figure S1.** Reversed-phase high-performance liquid chromatography (RP-HPLC) purification of the recombinant protegrin analogs. The fractions of the target peptides are marked with an asterisk.

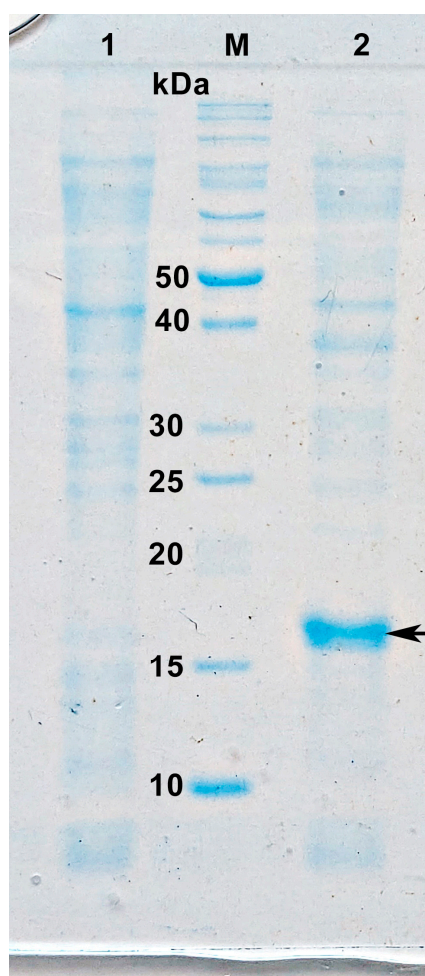

**Figure S2.** SDS-PAGE of the total lysate of *E. coli* BL21 (DE3) cells before (1) and after (2) IPTG induction, with  $\beta$ -mercaptoethanol. M – molecular mass standard. The arrows point at the target fusion protein (15.7 kDa), containing the [V16R] analog.
